# Supplementary material for: Controlled Au-coated PDMS microwell array for surface-enhanced DNA biochips
Source: Royal Society of Chemistry journal article supplement (doi:10.1039/d4lc00654b), 2024-11-27
Supplement: d4lc00654b1.pdf [file d4lc00654b1.pdf]

## Supplementary Information

### **Controlled Au-coated PDMS microwells array for surface-enhanced DNA biochips**

Yeongseok Jang<sup>1,2</sup>, Jonghyun Oh<sup>3,\*</sup>

<sup>1</sup>Department of Mechanical Design Engineering, Jeonbuk National University, Jeonju-si 54896, Jeollabuk-do, Republic of Korea

<sup>2</sup>Division of Engineering in Medicine, Department of Medicine, Brigham and Women's Hospital, Harvard Medical School, Cambridge, MA, 02139 USA

<sup>3</sup>Department of Nano-Bio Mechanical System Engineering, Jeonbuk National University, Jeonju-si 54896, Jeollabuk-do, Republic of Korea

\* Correspondence: [jonghyuno@jbnu.ac.kr](mailto:jonghyuno@jbnu.ac.kr); Tel.: +82-632704572; +82-632702451



**Fig. S1** Scanning electron microscope (SEM) observation of polydimethylsiloxane (PDMS) surfaces with 8 g elastomer base at different temperatures and pressure (same treatment time). Scale bar = 20 μm.



**Fig. S2** Thickness of microwell membrane according to polydimethylsiloxane (PDMS) elastomer base weight.



**Fig. S3** Images of a large-scale fabricated microwell membrane. Scale bar = 1 cm.



**Fig. S4** Fluorescence images of detected DNA on the surface and inside of 2.8-mm microwells under 0, +1, and +2 voltages with a treatment time of 60 s at a concentration of 8.6 ng/μL. Scale bar = 20 μm.



**Fig. S5** (A) Fluorescence microscopy images, (B) Fluorescence intensity plots of detected DNA in 2.8-mm microwells for 60 s at a concentration of 0 ng/μL under 0 voltage and at a concentration of 8.6 ng/μL under 0 and +2 voltages. Scale bar = 20 μm.



**Fig. S6** Field-emission scanning electron microscope (FE-SEM) images of attached DNA inside microwells at 0, 10, 30, and 60 s under 2 V electrophoresis.



**Fig. S7** (A) Fluorescence microscopy images, and (B) Quantitative analysis of fluorescence intensity on flat PDMS attached DNA at different concentrations (0, 0.86, 8.6, and 86 ng/μL) after electrophoresis for 60 seconds. Scale bar = 50 μm. \*,  $p < 0.05$ ; NS, not significant between groups.

**Table S1.** Performance comparison of DNA detection methods

| <b>Method</b>         | <b>RSD<br/>(Relative Standard<br/>Deviation)</b> | <b>Fabrication</b>                           | <b>Target</b>         | <b>Ref.</b>          |
|-----------------------|--------------------------------------------------|----------------------------------------------|-----------------------|----------------------|
| Photoelectrochemistry | < 10%                                            | Commercial well plate                        | DNA                   | [1]                  |
| Fluorescence          | 3.2%                                             | Soft lithography,<br>Droplet array<br>method | Lambda<br>DNA         | [2]                  |
| Electrochemistry      | 11.4%                                            | Plastic mask                                 | DNA                   | [3]                  |
| <b>Fluorescence</b>   | <b>1.85 %</b>                                    | <b>pressure-based steam<br/>technology</b>   | <b>Lambda<br/>DNA</b> | <b>This<br/>work</b> |

## References

- [1] Liu, Y., Jia, S., & Guo, L. H. (2012). Development of microplate-based photoelectrochemical DNA biosensor array for high throughput detection of DNA damage. *Sensors and Actuators B: Chemical*, 161(1), 334-340.
- [2] Li, X., Zhang, D., Zhang, H., Guan, Z., Song, Y., Liu, R., ... & Yang, C. (2018). Microwell array method for rapid generation of uniform agarose droplets and beads for single molecule analysis. *Analytical chemistry*, 90(4), 2570-2577.
- [3] Kokkinos, C., Economou, A., Speliotis, T., Petrou, P., & Kakabakos, S. (2015). Flexible microfabricated film sensors for the in situ quantum dot-based voltammetric detection of DNA hybridization in microwells. *Analytical chemistry*, 87(2), 853-857.
